# Supplementary material for: The Influence of Age, Sex, and Socioeconomic Status on Glycemic Control Among People With Type 1 and Type 2 Diabetes in Canada: Patient-Led Longitudinal Retrospective Cross-sectional Study With Multiple Time Points of Measurement
Source: PubMed Central journal article supplement (PMC10176138; doi:10.2196/35682), 2023-04-27
Supplement: diabetes_v8i1e35682_app1.pdf [file diabetes_v8i1e35682_app1.pdf]

# Multimedia Appendix: Pairwise contrasts and sensitivity analyses

## Pairwise Contrasts

Figure S1. Pairwise contrasts for sex differences in HbA1c results in each age categories

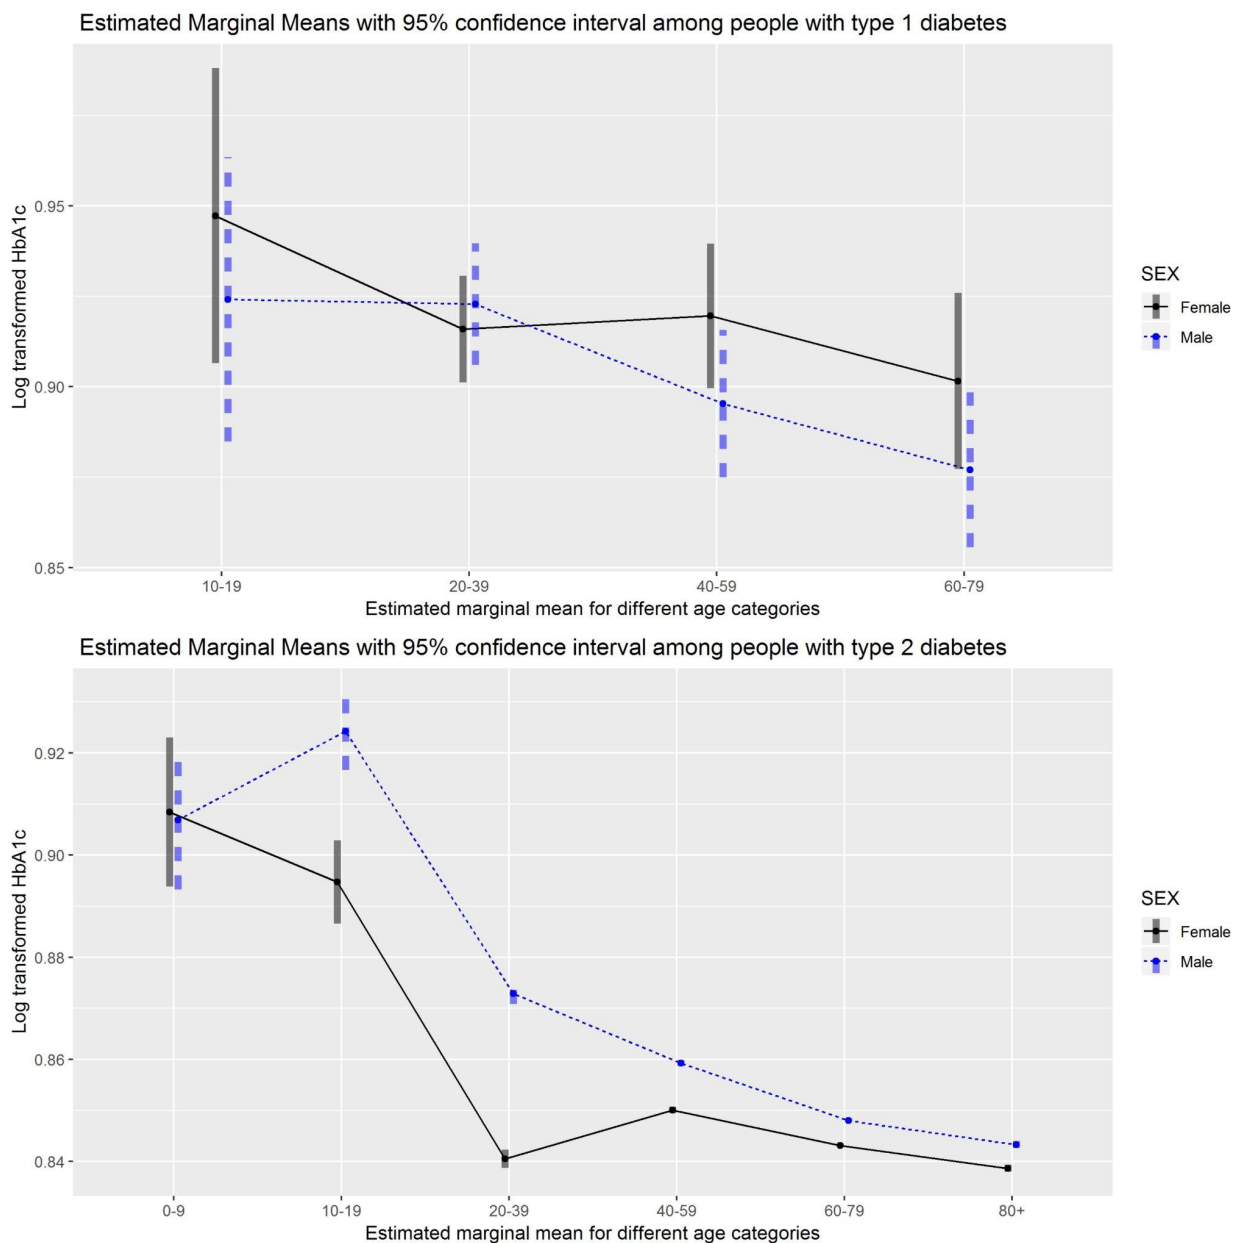

**Table S1. Pairwise contrasts for sex differences in HbA1c results in people with type 1 and 2 diabetes in each age category**

|              | Type 1 diabetes (total n = 1949 HbA1c results from 296 people) |                |         | Type 2 diabetes (total n = 945,262 HbA1c results from 90,417 people) |                |         |
|--------------|----------------------------------------------------------------|----------------|---------|----------------------------------------------------------------------|----------------|---------|
| Age Category | Estimate                                                       | Standard Error | P-value | Estimate                                                             | Standard Error | P-value |
| 10 - 19      | 0.02314                                                        | 0.0291         | 0.4260  | -0.0295                                                              | 0.00568        | <.0001  |
| 20 - 39      | -0.00689                                                       | 0.0114         | 0.5450  | -0.0324                                                              | 0.00137        | <.0001  |
| 40 - 59      | 0.02426                                                        | 0.0146         | 0.097   | -0.0092                                                              | 0.00043        | <.0001  |
| 60 - 79      | 0.02456                                                        | 0.0165         | 0.1380  | -0.0049                                                              | 0.00027        | <.0001  |
| 80+          | -                                                              | -              | -       | -0.0046                                                              | 0.0005         | <.0001  |

# Sensitivity Analysis: Changes in Practice and Guidelines

**Figure S2. Mean HbA1c of male and female people across all ages of people with type 1 and type 2 diabetes in Canada: 2010-2012**

2010-2012 Smoothed (loess) curve and 95% confidence interval of mean HbA1c results among people with type 1 diabetes (n=257 results)

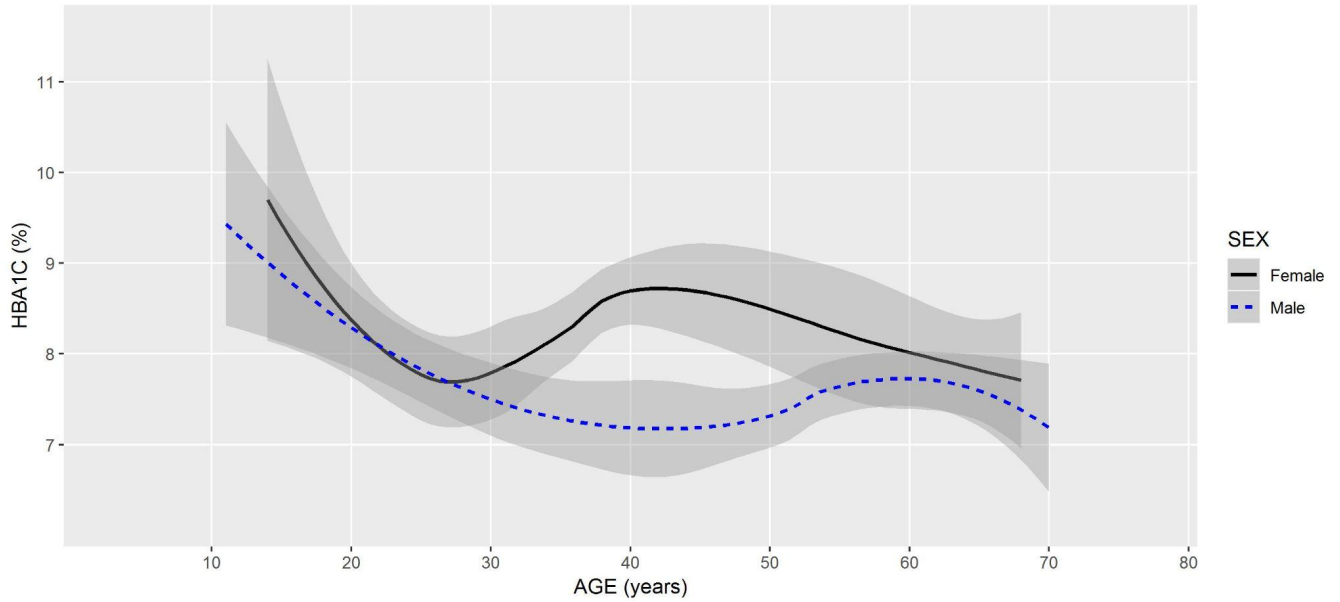

2010-2012 Smoothed (gam) curve and 95% confidence interval of mean HbA1c results among people with type 2 diabetes (n=188,837 results)

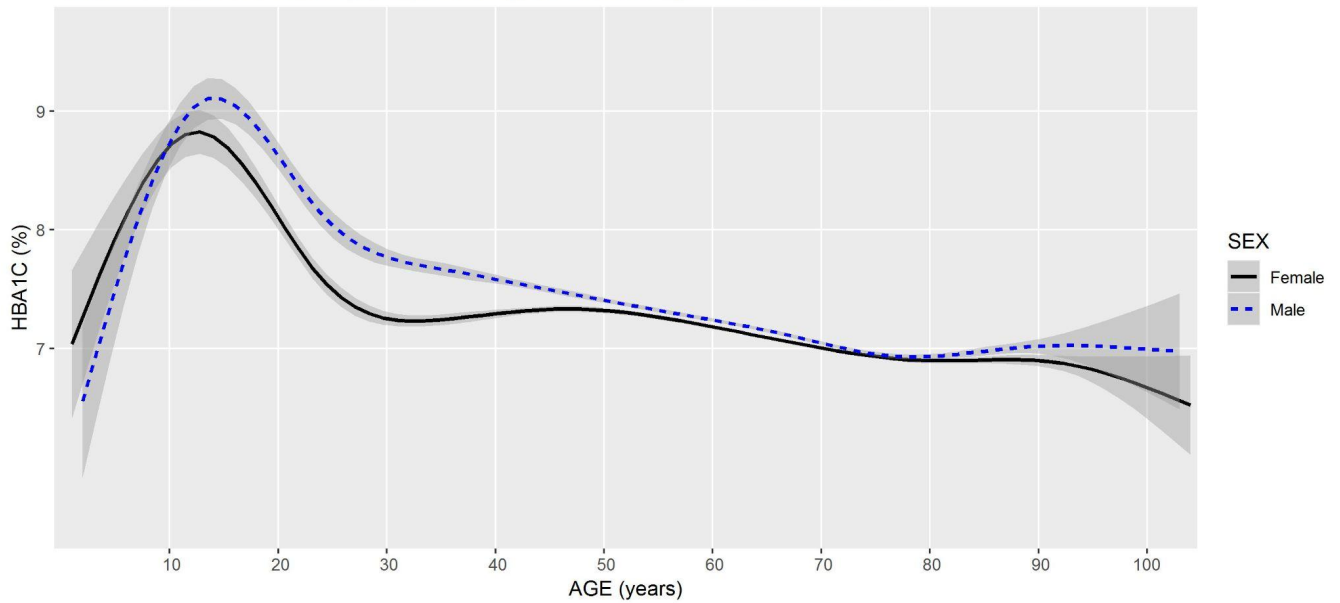

**Figure S3. Mean HbA1c of male and female people across all ages of people with type 1 and type 2 diabetes in Canada: 2013-2016**

2013-2016 Smoothed (loess) curve and 95% confidence interval of mean HbA1c results among people with type 1 diabetes (n=678 results)

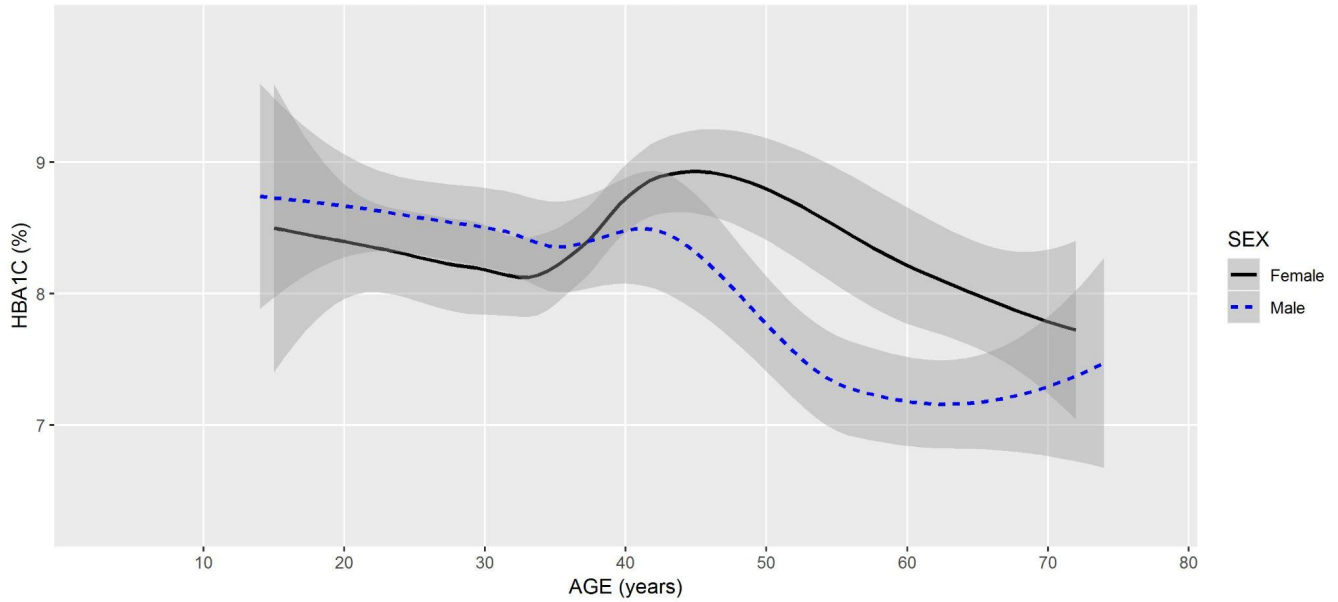

2013-2016 Smoothed (gam) curve and 95% confidence interval of mean HbA1c results among people with type 2 diabetes (n=420,623 results)

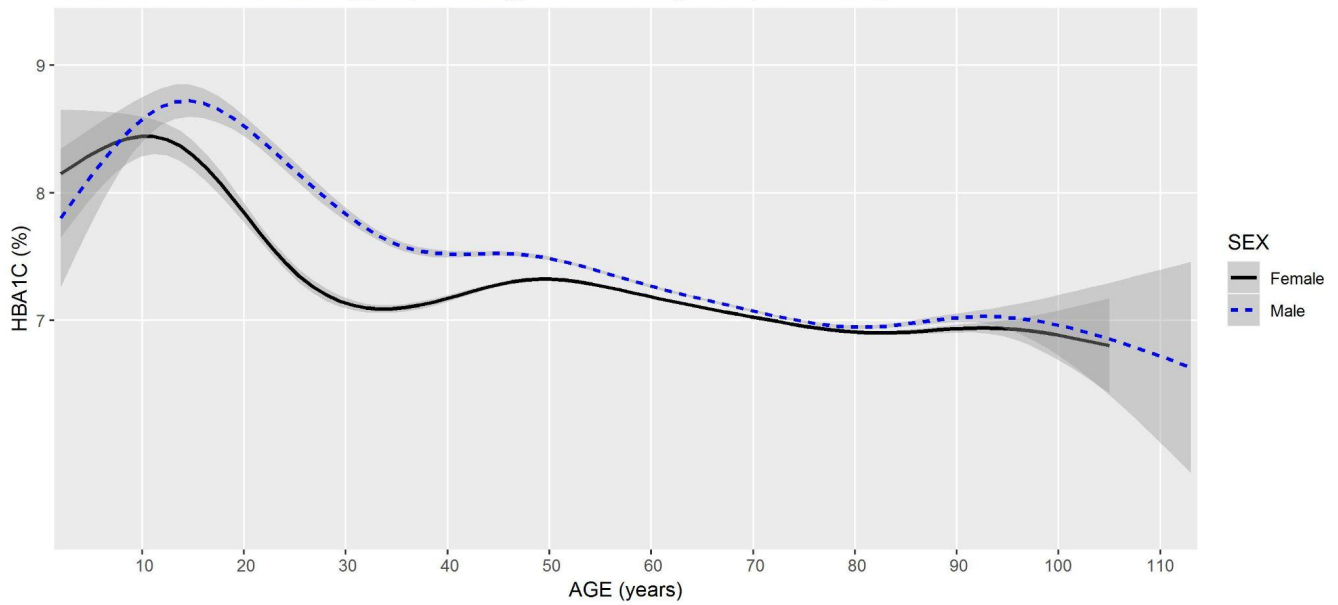

**Figure S4. Mean HbA1c of male and female people across all ages of people with type 1 and type 2 diabetes in Canada: 2017-2019**

2017-2019 Smoothed (loess) curve and 95% confidence interval of mean HbA1c results among people with type 1 diabetes (n=1014 results)

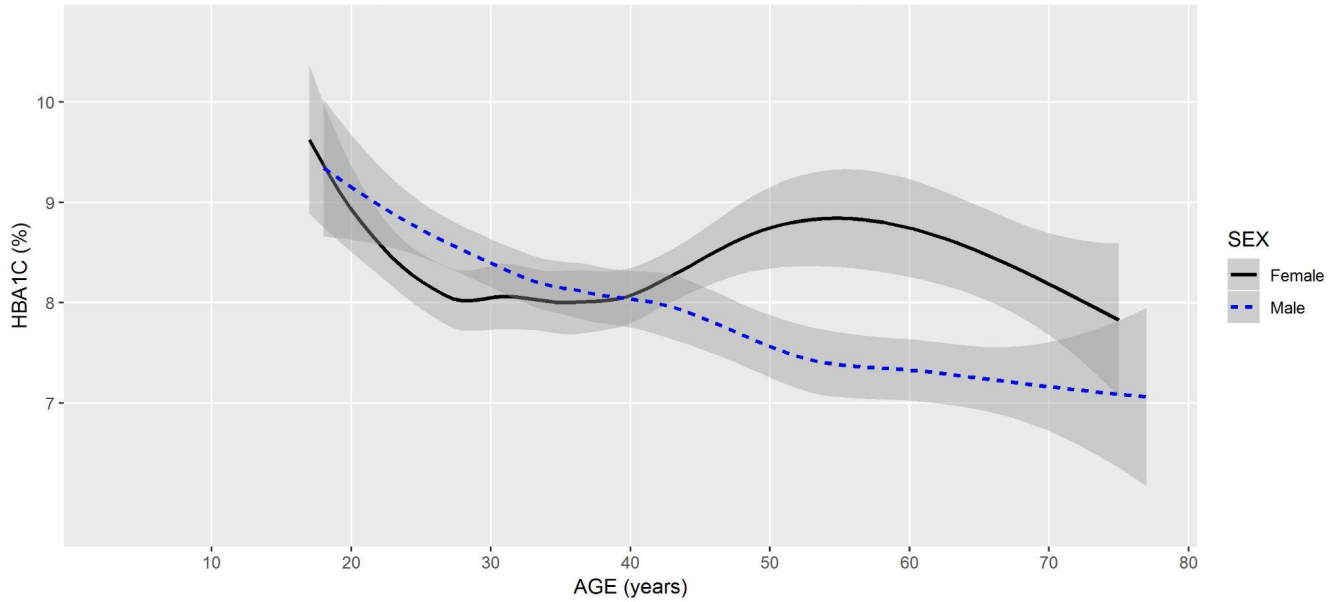

2017-2019 Smoothed (gam) curve and 95% confidence interval of mean HbA1c results among people with type 2 diabetes (n=335991 results)

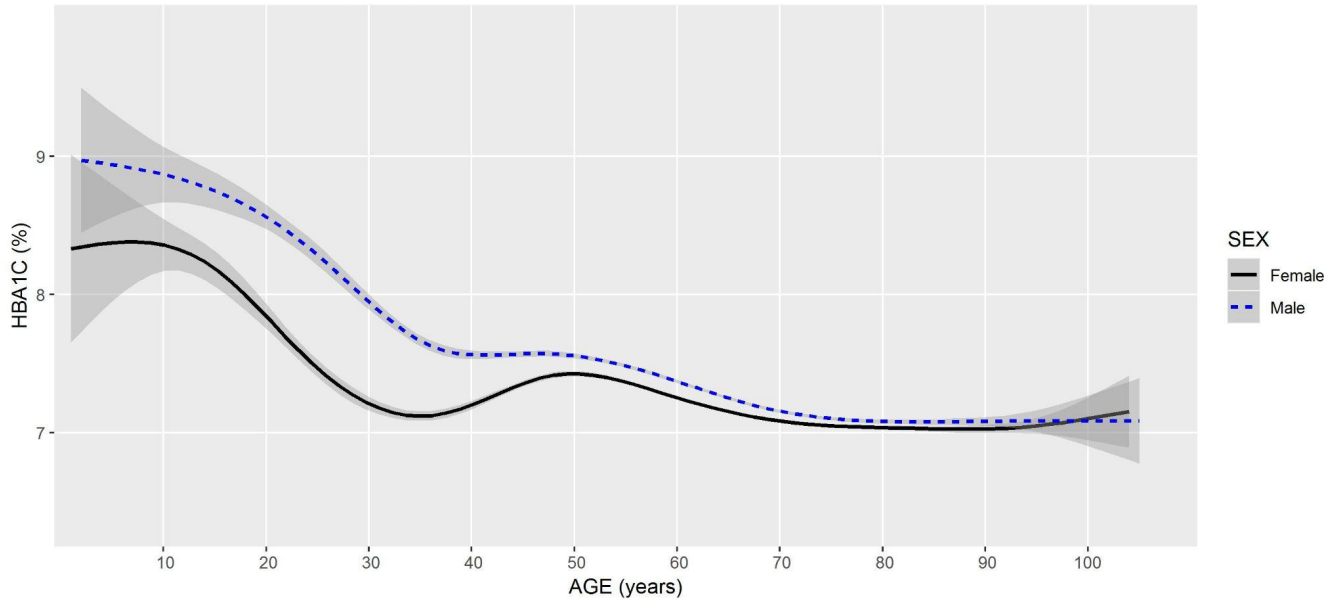

**Table S2. Relationships between age, sex, socioeconomic status and HbA1c among people with type 1 and type 2 diabetes in Canada: 2010-2012**

|                      | Type 1 diabetes (total n = 257 HbA1c results from 77 people) |         | Type 2 diabetes (total n = 188,837 HbA1c results from 47,090 people) |         |
|----------------------|--------------------------------------------------------------|---------|----------------------------------------------------------------------|---------|
|                      | F statistic                                                  | P value | F statistic                                                          | P value |
| Age                  | 1.10                                                         | 0.3475  | 257.452                                                              | <.0001  |
| Sex                  | 7.25                                                         | 0.0071  | 37.377                                                               | <.0001  |
| Socioeconomic Status | 0.93                                                         | 0.4435  | 40.189                                                               | <.0001  |
| Age:Sex interaction  | 0.61                                                         | 0.6043  | 22.887                                                               | <.0001  |

**Table S3. Pairwise contrasts for sex differences in HbA1c results in people with type 1 and 2 diabetes in each age categories: 2010-2012**

|              | Type 1 diabetes (total n = 257 HbA1c results from 77 people) |                |         | Type 2 diabetes (total n = 188,837 HbA1c results from 47,090 people) |                |         |
|--------------|--------------------------------------------------------------|----------------|---------|----------------------------------------------------------------------|----------------|---------|
| Age Category | Estimate                                                     | Standard Error | P-value | Estimate                                                             | Standard Error | P-value |
| 10 - 19      | 0.0516                                                       | 0.0359         | 0.1509  | -0.02329                                                             | 0.010546       | 0.0272  |
| 20 - 39      | 0.0233                                                       | 0.0242         | 0.3364  | -0.02999                                                             | 0.002920       | <.0001  |
| 40 - 59      | 0.0627                                                       | 0.0261         | 0.0163  | -0.00670                                                             | 0.000867       | <.0001  |
| 60 - 79      | 0.040                                                        | 0.0217         | 0.0646  | -0.00310                                                             | 0.000548       | <.0001  |
| 80+          | -                                                            | -              | -       | -0.00452                                                             | 0.001048       | <.0001  |

**Table S4. Relationships between age, sex, socioeconomic status and HbA1c among people with type 1 and type 2 diabetes in Canada: 2013-2016**

|                      | Type 1 diabetes (total n = 678 HbA1c results from 163 people) |         | Type 2 diabetes (total n = 420,623 HbA1c results from 73,296 people) |         |
|----------------------|---------------------------------------------------------------|---------|----------------------------------------------------------------------|---------|
|                      | F statistic                                                   | P value | F statistic                                                          | P value |
| Age                  | 2.542                                                         | 0.0544  | 461.355                                                              | <.0001  |
| Sex                  | 0.433                                                         | 0.5106  | 65.706                                                               | <.0001  |
| Socioeconomic Status | 0.705                                                         | 0.5882  | 134.285                                                              | <.0001  |
| Age:Sex              | 4.159                                                         | 0.0059  | 56.584                                                               | <.0001  |

|             |  |  |  |  |
|-------------|--|--|--|--|
| interaction |  |  |  |  |
|-------------|--|--|--|--|

**Table S5. Pairwise contrasts for sex differences in HbA1c results in people with type 1 and 2 diabetes in each age categories: 2013-2016**

|              | Type 1 diabetes (total n = 678 HbA1c results from 163 people) |                |         | Type 2 diabetes (total n = 420,623 HbA1c results from 73,296 people) |                |         |
|--------------|---------------------------------------------------------------|----------------|---------|----------------------------------------------------------------------|----------------|---------|
| Age Category | Estimate                                                      | Standard Error | P-value | Estimate                                                             | Standard Error | P-value |
| 10 - 19      | -0.02255                                                      | 0.0336         | 0.5023  | -0.02249                                                             | 0.008527       | 0.0084  |
| 20 - 39      | -0.00885                                                      | 0.0153         | 0.5627  | -0.03181                                                             | 0.001962       | <.0001  |
| 40 - 59      | 0.06349                                                       | 0.0194         | 0.0011  | -0.01017                                                             | 0.000605       | <.0001  |
| 60 - 79      | 0.00311                                                       | 0.0225         | 0.8899  | -0.00405                                                             | 0.000374       | <.0001  |
| 80+          | -                                                             | -              | -       | -0.00322                                                             | 0.000697       | <.0001  |

**Table S6. Relationships between age, sex, socioeconomic status and HbA1c among people with type 1 and type 2 diabetes in Canada: 2017-2019**

|                      | Type 1 diabetes (total n = 1014 HbA1c results from 274 people) |         | Type 2 diabetes (total n = 335,991 HbA1c results from 73,854 people) |         |
|----------------------|----------------------------------------------------------------|---------|----------------------------------------------------------------------|---------|
|                      | F statistic                                                    | P value | F statistic                                                          | P value |
| Age                  | 4.659                                                          | 0.0029  | 535.204                                                              | <.0001  |
| Sex                  | 2.763                                                          | 0.0965  | 56.442                                                               | <.0001  |
| Socioeconomic Status | 0.807                                                          | 0.5203  | 84.852                                                               | <.0001  |
| Age:Sex interaction  | 2.119                                                          | 0.0955  | 46.747                                                               | <.0001  |

**Table S7. Pairwise contrast for sex differences in HbA1c results in people with type 1 and 2 diabetes in each age categories: 2017-2019**

|              | Type 1 diabetes (total n = 1014 HbA1c results from 274 people) |                |         | Type 2 diabetes (total n = 335,991 HbA1c results from 73,854 people) |                |         |
|--------------|----------------------------------------------------------------|----------------|---------|----------------------------------------------------------------------|----------------|---------|
| Age Category | Estimate                                                       | Standard Error | P-value | Estimate                                                             | Standard Error | P-value |
| 10 - 19      | 0.00657                                                        | 0.0601         | 0.2748  | -0.5686                                                              | 0.19747        | 0.004   |
| 20 - 39      | -0.0115                                                        | 0.0136         | 0.3967  | -0.6180                                                              | 0.04146        | <.0001  |

|         |        |        |        |         |         |        |
|---------|--------|--------|--------|---------|---------|--------|
| 40 - 59 | 0.0280 | 0.0159 | 0.0784 | -0.1693 | 0.01275 | <.0001 |
| 60 - 79 | 0.0295 | 0.0167 | 0.0767 | -0.0919 | 0.00707 | <.0001 |
| 80+     | -      | -      | -      | -0.0797 | 0.01294 | <.0001 |



## Sensitivity Analysis: Analyses Without Earliest HbA1c Results

**Table S8. Relationships between age, sex, socioeconomic status and HbA1c among people with type 1 and type 2 diabetes in Canada with all first HbA1c results in the database removed**

|                      | Type 1 diabetes (total n = 1653 HbA1c results from 241 people) |         | Type 2 diabetes (total n = 854,845 HbA1c results from 83,107 people) |         |
|----------------------|----------------------------------------------------------------|---------|----------------------------------------------------------------------|---------|
|                      | F statistic                                                    | P value | F statistic                                                          | P value |
| Age                  | 2.65                                                           | 0.04    | 19.80                                                                | <.0001  |
| Sex                  | 1.81                                                           | 0.17    | 54.45                                                                | <.0001  |
| Socioeconomic Status | 1.02                                                           | 0.39    | 54.31                                                                | <.0001  |
| Age:Sex interaction  | 0.68                                                           | 0.55    | 12.20                                                                | <.0001  |

**Table S9. Pairwise contrasts for sex differences in HbA1c results in people with type 1 and 2 diabetes in each age category with all first HbA1c results in the database removed**

|              | Type 1 diabetes (total n = 1653 HbA1c results from 241 people) |                |         | Type 2 diabetes (total n = 854,845 HbA1c results from 83,107 people) |                |         |
|--------------|----------------------------------------------------------------|----------------|---------|----------------------------------------------------------------------|----------------|---------|
| Age Category | Estimate                                                       | Standard Error | P-value | Estimate                                                             | Standard Error | P-value |
| 10 - 19      | 0.00592                                                        | 0.0365         | 0.871   | -0.02367                                                             | 0.009231       | <.0001  |
| 20 - 39      | 0.00534                                                        | 0.0123         | 0.6651  | -0.024                                                               | 0.002253       | <.0001  |
| 40 - 59      | 0.02746                                                        | 0.0138         | 0.0466  | -0.00897                                                             | 0.000762       | <.0001  |
| 60 - 79      | 0.02736                                                        | 0.0162         | 0.0912  | -0.00794                                                             | 0.000544       | <.0001  |
| 80+          | -                                                              | -              | -       | -0.00816                                                             | 0.000896       | <.0001  |
